# Supplementary material for: Pt/C–LiCoO2composites with ultralow Pt loadings as synergistic bifunctional electrocatalysts for oxygen reduction and evolution reactions
Source: Royal Society of Chemistry journal article supplement (doi:10.1039/c5ta10492k), 2016-01-01
Supplement: c5ta10492k1.pdf [file c5ta10492k1.pdf]

## Supporting Information

### **Pt/C-LiCoO<sub>2</sub> composites with ultralow Pt loadings as synergistic bifunctional electrocatalysts for the oxygen reduction and evolution reactions**

Chao Su,<sup>a</sup> Tao Yang,<sup>b</sup> Wei Zhou,<sup>c</sup> Wei Wang,<sup>a</sup> Xiaomin Xu<sup>c</sup> and Zongping Shao<sup>\*ad</sup>

<sup>a</sup>Department of Chemical Engineering, Curtin University, Perth, Western Australia 6845, Australia.

<sup>b</sup>Centre of Mechanical Technology and Automation (TEMA), Department of Mechanical Engineering, University of Aveiro, 3810-193, Aveiro, Portugal.

<sup>c</sup>State Key Laboratory of Materials-Oriented Chemical Engineering, College of Chemistry and Chemical Engineering, Nanjing Tech University, No. 5 Xin Mofan Road, Nanjing 210009, P. R. China.

<sup>d</sup>State Key Laboratory of Materials-Oriented Chemical Engineering, College of Energy, Nanjing Tech University, No. 5 Xin Mofan Road, Nanjing 210009, P. R. China.

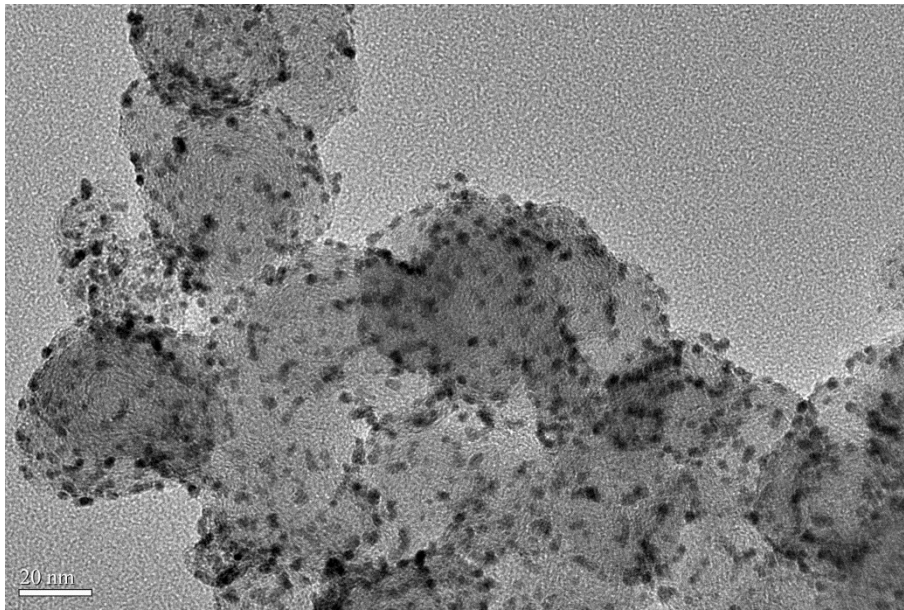

Fig. S1 Transmission electron microscopy (TEM) image of commercial 20 wt% Pt/C.

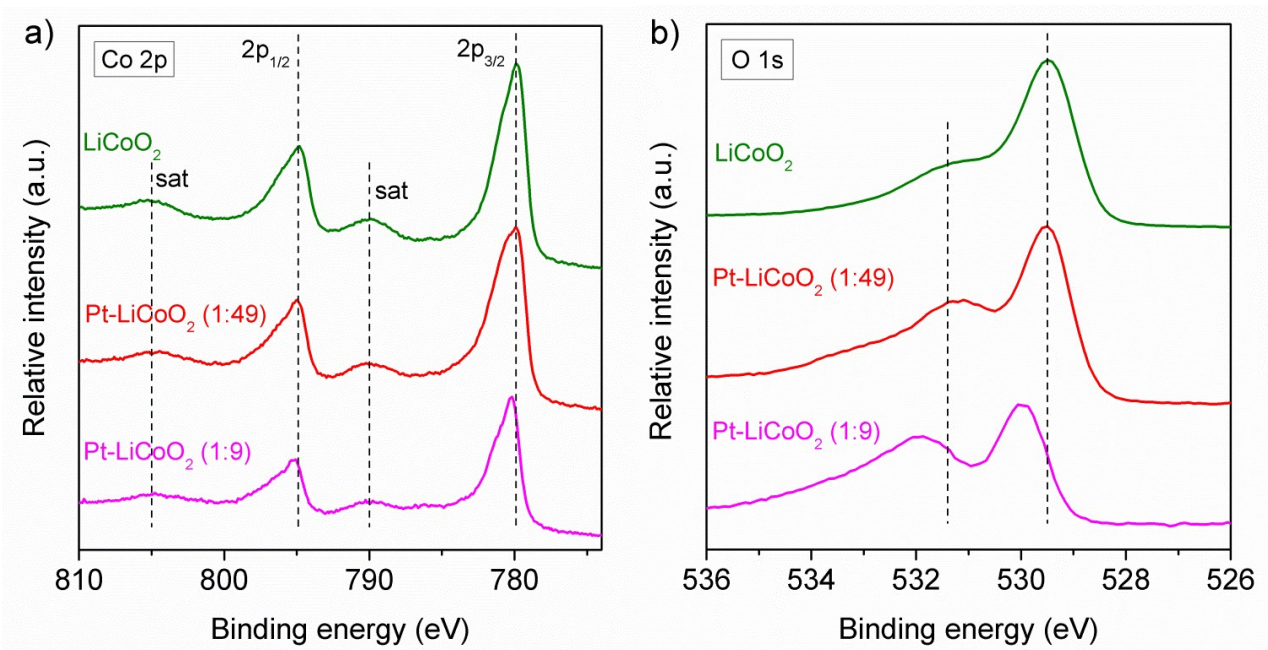

Fig. S2 a) Co 2p and b) O 1s X-ray photoelectron spectra (XPS) of LiCoO<sub>2</sub>, Pt-LiCoO<sub>2</sub> (1:49) and Pt-LiCoO<sub>2</sub> (1:9) catalysts.

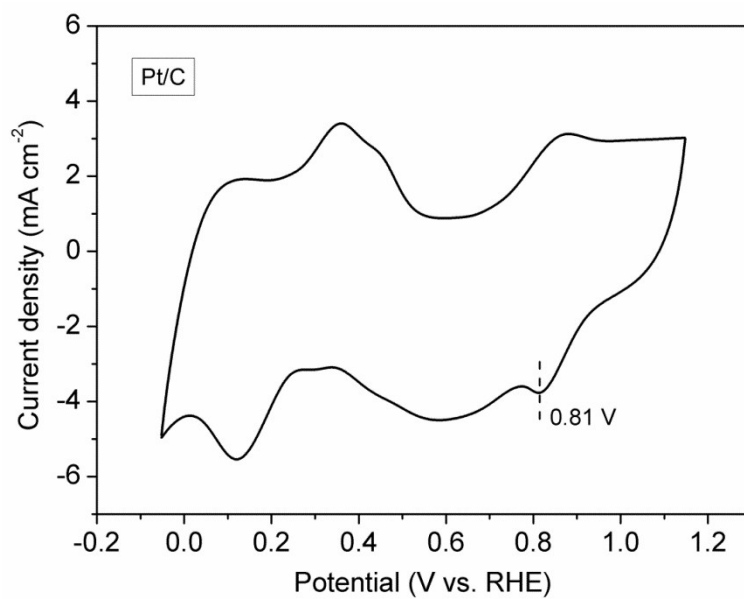

Fig. S3 Cyclic voltammogram (CV) curve of oxygen reduction reaction (ORR) on commercial 20 wt% Pt/C in an O<sub>2</sub>-saturated 0.1 M KOH solution at a scan rate of 50 mV s<sup>-1</sup>.

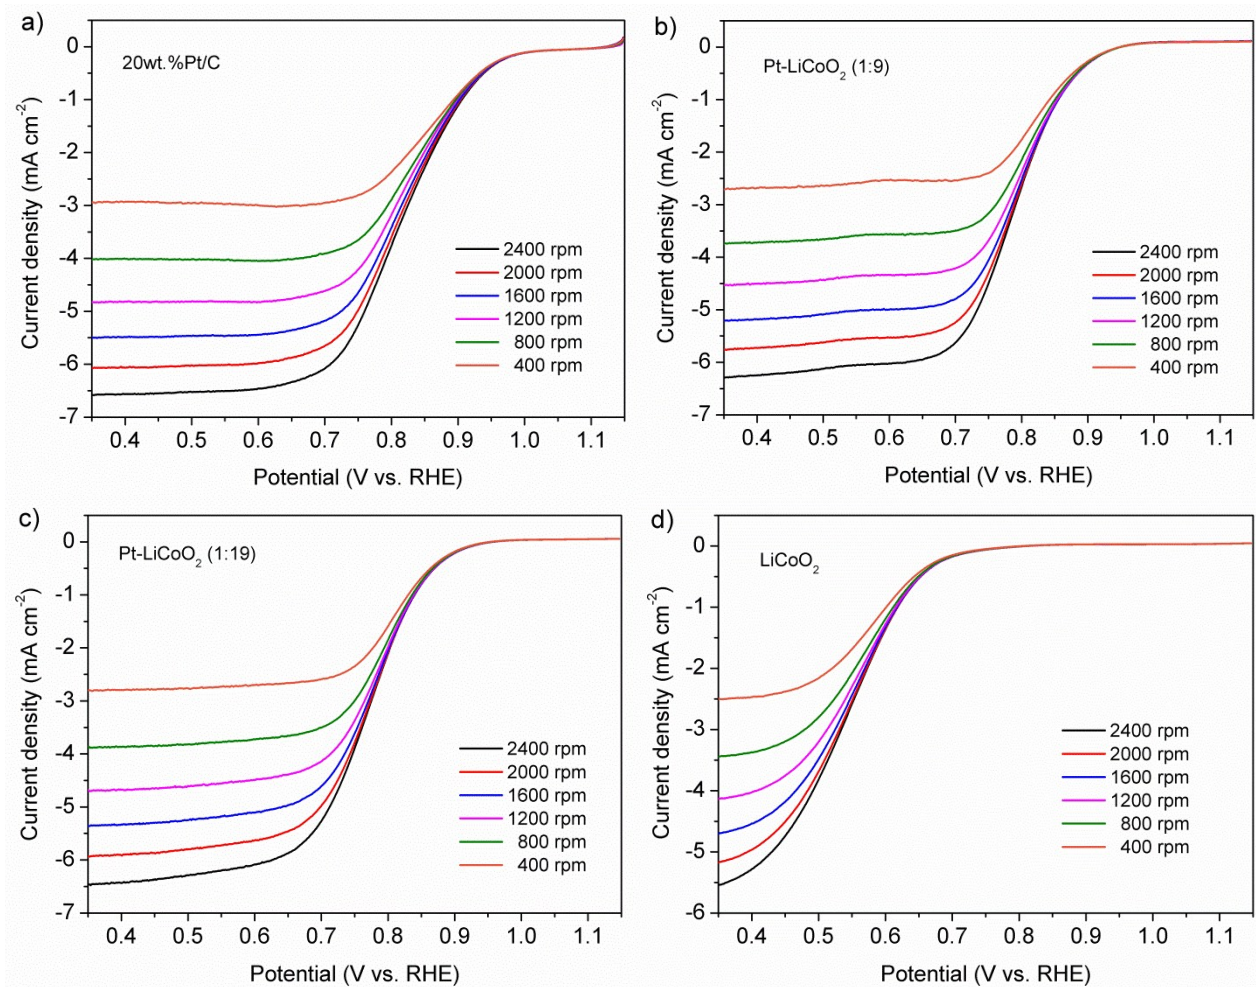

Fig. S4 Linear sweep voltammogram (LSV) curves of a) commercial 20 wt% Pt/C, b) Pt-LiCoO<sub>2</sub> (1:9), c) Pt-LiCoO<sub>2</sub> (1:19) and d) LiCoO<sub>2</sub> on the rotating disk electrode (RDE) at different rotating rates.

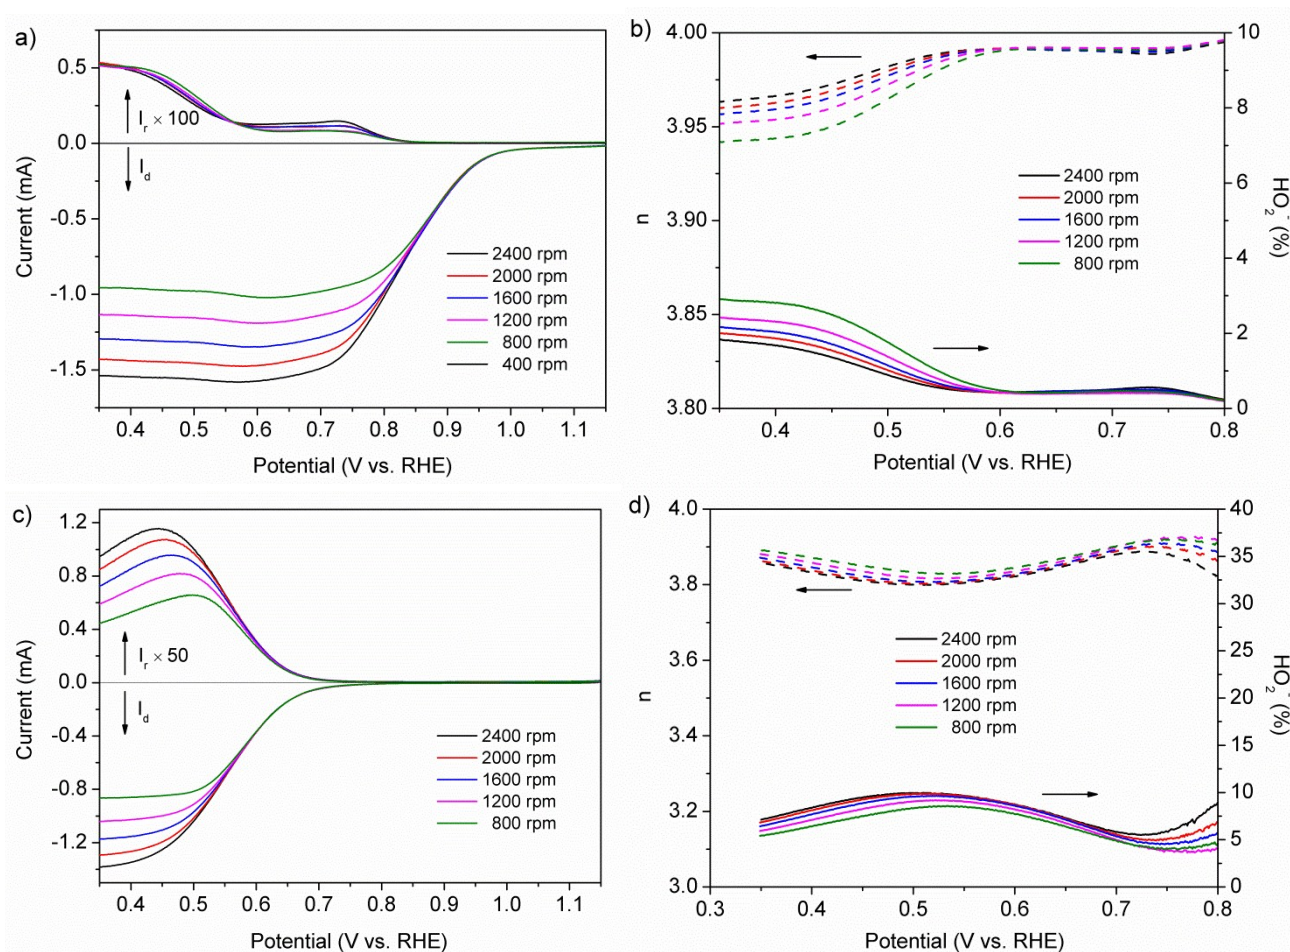

Fig. S5 a) & c) Disk (bottom) and ring currents (top, multiplied by 100) of a) commercial 20 wt% Pt/C and c) LiCoO<sub>2</sub> collected on the rotating ring-disk electrode (RRDE) at different rotating rates in O<sub>2</sub>-saturated 0.1 M KOH electrolyte. b) & d) The electron transfer number (n, dash line) and percentage of HO<sub>2</sub><sup>-</sup> (solid line) of b) commercial 20 wt% Pt/C and d) LiCoO<sub>2</sub> catalyst at various potentials based on the RRDE data in a) and c).

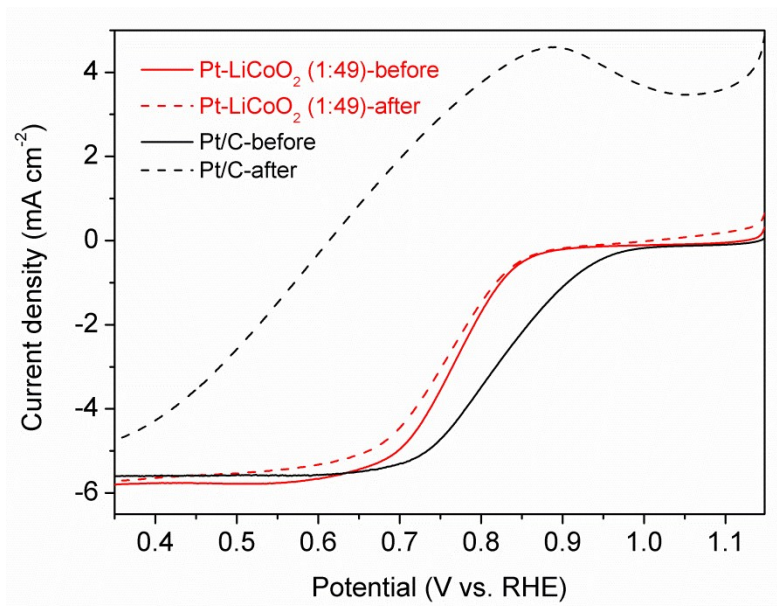

Fig. S6 LSV curves of Pt-LiCoO<sub>2</sub> (1:49) and commercial 20 wt% Pt/C before and after the addition of 0.5 M methanol in O<sub>2</sub>-saturated 0.1 M KOH electrolyte at 1600 rpm.

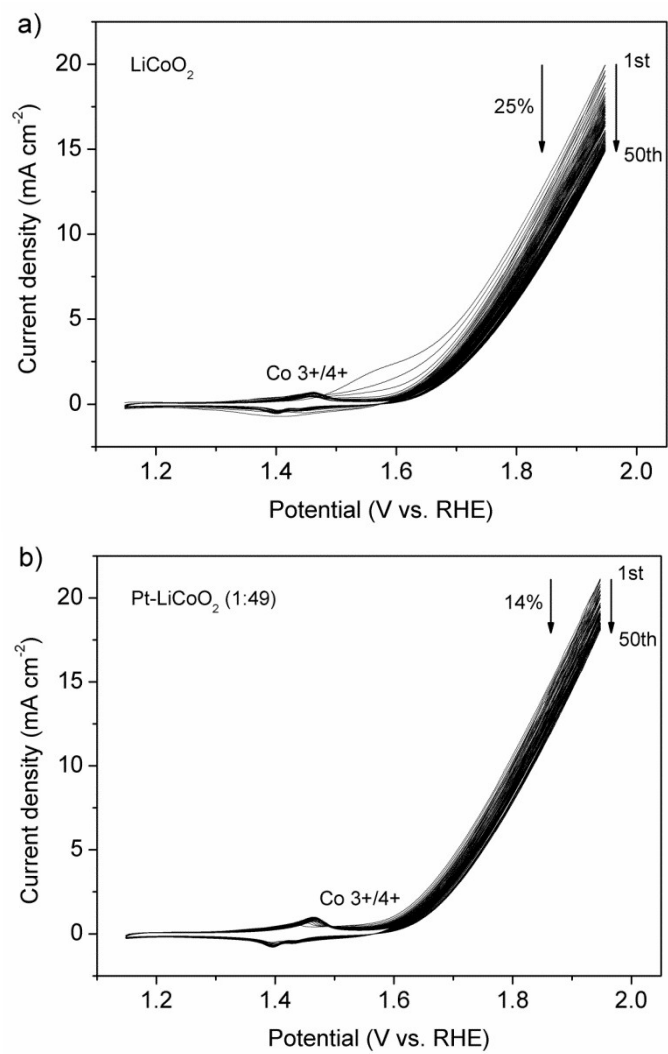

Fig. S7 CVs of a) LiCoO<sub>2</sub> and b) Pt-LiCoO<sub>2</sub> (1:49) catalysts for 50 cycles at a scan rate of 10 mV s<sup>-1</sup>.
